# Supplementary material for: A Four‐Gene Autophagy‐Related Prognostic Model Signature and Its Association With Immune Phenotype in Lung Squamous Cell Carcinoma
Source: Cancer Rep (Hoboken). 2024 Oct 23;7(10):e70000. doi: 10.1002/cnr2.70000 (PMC11499073; doi:10.1002/cnr2.70000)
Supplement: Supplementary file 7 — Table S2. The gene list of 54 survival‐related ARGs (sARGs). [file CNR2-7-e70000-s001.xlsx]

## Sheet: Sheet1
	Symbol
1	AMBRA1
2	CTSD
3	PRKAB1
4	ATG2A
5	RGS19
6	ITGB1
7	MTOR
8	ATG10
9	ATF6
10	TM9SF1
11	RB1
12	NBR1
13	DLC1
14	SH3GLB1
15	TSC1
16	FADD
17	ITGA3
18	CAPN1
19	RB1CC1
20	CFLAR
21	BNIP1
22	ATG12
23	TSC2
24	BAK1
25	CANX
26	ARSA
27	ARSB
28	CAMKK2
29	CAPNS1
30	ATIC
31	HDAC6
32	ITGB4
33	HSPB8
34	CDKN1B
35	KIF5B
36	MAPK3
37	MLST8
38	FOXO3
39	SIRT1
40	SERPINA1
41	EDEM1
42	GOPC
43	GOPC.1
44	MYC
45	HSPA8
46	BECN1
47	RAB11A
48	USP10
49	PINK1
50	EEF2K
51	ATG16L2
52	NFKB1
53	CDKN1A
54	CHMP2B
